# Supplementary material for: Activation and inhibition of tph2 serotonergic neurons operate in tandem to influence larval zebrafish preference for light over darkness
Source: PubMed Central journal article supplement (PMC4751628; doi:10.1038/srep20788), 2016-02-12
Supplement: srep20788-s1.pdf [file srep20788-s1.pdf]

# Activation and inhibition of *tph2* serotonergic neurons operate in tandem to influence larval zebrafish preference for light over darkness

Ruey-Kuang Cheng<sup>1</sup>, Seetha Krishnan<sup>2</sup> and Suresh Jesuthasan<sup>1, 3, 4, \*</sup>

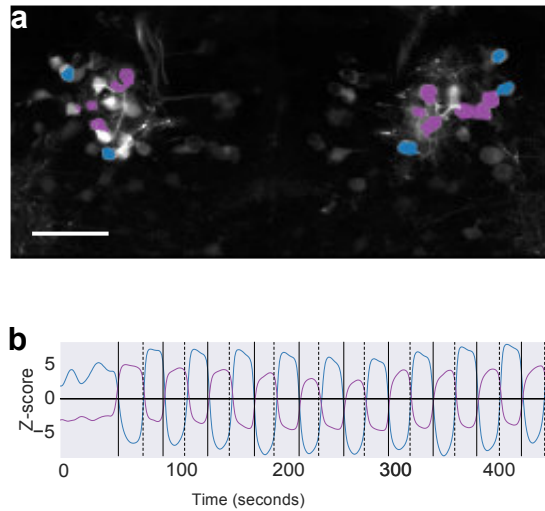

**Figure S1. Response of pretectal *tph2* neurons to light and darkness.** (a) Dorsal view of the pre-tectal area of a 11 dpf *Tg(tph2:GAL4, UAS:GCaMP6s)* fish, with anterior at the top. The purple colour indicates cells that are excited by light (ON cells), whereas the blue colour indicates cells that are excited by darkness (OFF cells). (b) Response of pretectal *tph2* neurons to light and darkness, determined using k-means clustering of a time-series recorded at 1 Hz. The series was analysed using the Thunder platform. Scale bar = 25  $\mu\text{m}$ .
